# Supplementary material
Source: HighWire-hosted journal article supplement (https://ebm.bmj.com/content/22/5/164)
Supplement: inline-supplementary-material-3 [file inline-supplementary-material-3.pdf]

## Supplemental table 2. List of included guidelines<sup>1-69</sup>

1. Chambers HG, Shea KG, Anderson AF, et al. The Diagnosis and Treatment of Osteochondritis: American academy of Orthopaedic Surgeons (AAOS), 2010.
2. Della Valle C, Parvizi J, Bauer TW, et al. The diagnosis of periprosthetic joint infections of the hip and knee: American Academy of Orthopaedic Surgeons (AAOS), 2010.
3. Jacobs JJ, Mont MA, Bozic KJ, et al. Preventing venous thromboembolic disease in patients undergoing elective hip and knee arthroplasty: American Academy of Orthopaedic Surgeons (AAOS), 2011.
4. Jevsevar DS, Brown GA, Jones DL, et al. Treatment of Osteoarthritis of the Knee: American Academy of Orthopaedic Surgeons (AAOS), 2013.
5. Madadi P, Amstutz U, Rieder M, et al. Clinical practice guideline: CYP2D6 genotyping for safe and efficacious codeine therapy. *J Popul Ther Clin Pharmacol* 2013;20(3):e369-96.
6. Neis KJ, Zubke W, Fehr M, et al. Hysterectomy for Benign Uterine Disease. *Dtsch Arztebl Int* 2016;113(14):242-9. doi: 10.3238/arztebl.2016.0242
7. Winters JC, Dmochowski RR, Goldman HB, et al. Adult Urodynamics: AUA/SUFU Guideline: American Urological Association, 2012.
8. Donat SM, Diaz M, Bishoff JT, et al. Follow-up for clinically localized renal neoplasms: AUA guideline: American Urological Association (AUA), 2013.
9. Morey AF, Brandes S, Dugi III DD, et al. Urotrauma: AUA guideline: American Urological Association (AUA), 2014.
10. Cookson MS, Roth BJ, Dahm P, et al. Castration-resistant prostate cancer: AUA guideline: American urological Association (AUA), 2015.
11. Wessells H, Angermeier KW, Elliott SP, et al. Male Urethral Structure: American Urological Association (AUA), 2016.
12. Vargo L, Seri I. New NANN Practice Guideline: the management of hypotension in the very-low-birth-weight infant. *Adv Neonatal Care* 2011;11(4):272-8. doi: 10.1097/ANC.0b013e318229263c
13. Ahmed AI, Soliman SM, Awad LA. Validation of evidence-based clinical practice guideline: Nursing intervention for newly diagnosed pulmonary tuberculosis patients at community setting. *Alexandria Journal of Medicine* 2012;48(2):155-65. doi: 10.1016/j.ajme.2011.08.002
14. American Diabetes A. Standards of medical care in diabetes--2010. *Diabetes Care* 2010;33 Suppl 1:S11-61. doi: 10.2337/dc10-S011
15. American Diabetes A. Diabetes management in correctional institutions. *Diabetes Care* 2010;33 Suppl 1:S75-81. doi: 10.2337/dc10-S075
16. American Diabetes A. Diabetes and employment. *Diabetes Care* 2010;33 Suppl 1:S82-6. doi: 10.2337/dc10-S082
17. American Diabetes A. Standards of medical care in diabetes--2011. *Diabetes Care* 2011;34 Suppl 1:S11-61. doi: 10.2337/dc11-S011
18. American Diabetes A. Diabetes management in correctional institutions. *Diabetes Care* 2011;34 Suppl 1:S75-81. doi: 10.2337/dc11-S075
19. American Diabetes A. Diabetes and employment. *Diabetes Care* 2011;34 Suppl 1:S82-6. doi: 10.2337/dc11-S082
20. American Diabetes A. Standards of medical care in diabetes--2012. *Diabetes Care* 2012;35 Suppl 1:S11-63. doi: 10.2337/dc12-s011
21. American Diabetes A. Diabetes management in correctional institutions. *Diabetes Care* 2012;35 Suppl 1:S87-93. doi: 10.2337/dc12-s087
22. American Diabetes A. Standards of medical care in diabetes--2013. *Diabetes Care* 2013;36 Suppl 1:S11-66. doi: 10.2337/dc13-S011

23. American Diabetes A. Standards of medical care in diabetes--2014. *Diabetes Care* 2014;37 Suppl 1:S14-80. doi: 10.2337/dc14-S014
24. American Diabetes A. Diabetes management in correctional institutions. *Diabetes Care* 2014;37 Suppl 1:S104-11. doi: 10.2337/dc14-S104
25. American Diabetes A. (2) Classification and diagnosis of diabetes. *Diabetes Care* 2015;38 Suppl:S8-S16. doi: 10.2337/dc15-S005
26. American Diabetes A. (3) Initial evaluation and diabetes management planning. *Diabetes Care* 2015;38 Suppl:S17-9. doi: 10.2337/dc15-S006
27. American Diabetes A. (4) Foundations of care: education, nutrition, physical activity, smoking cessation, psychosocial care, and immunization. *Diabetes Care* 2015;38 Suppl:S20-30. doi: 10.2337/dc15-S007
28. American Diabetes A. (5) Prevention or delay of type 2 diabetes. *Diabetes Care* 2015;38 Suppl:S31-2. doi: 10.2337/dc15-S008
29. American Diabetes A. (6) Glycemic targets. *Diabetes Care* 2015;38 Suppl:S33-40. doi: 10.2337/dc15-S009
30. American Diabetes A. (7) Approaches to glycemic treatment. *Diabetes Care* 2015;38 Suppl:S41-8. doi: 10.2337/dc15-S010
31. American Diabetes A. (8) Cardiovascular disease and risk management. *Diabetes Care* 2015;38 Suppl:S49-57. doi: 10.2337/dc15-S011
32. American Diabetes A. (9) Microvascular complications and foot care. *Diabetes Care* 2015;38 Suppl:S58-66. doi: 10.2337/dc15-S012
33. American Diabetes A. (10) Older adults. *Diabetes Care* 2015;38 Suppl:S67-9. doi: 10.2337/dc15-S013
34. American Diabetes A. (11) Children and adolescents. *Diabetes Care* 2015;38 Suppl:S70-6. doi: 10.2337/dc15-S014
35. American Diabetes A. (13) Diabetes care in the hospital, nursing home, and skilled nursing facility. *Diabetes Care* 2015;38 Suppl:S80-5. doi: 10.2337/dc15-S016
36. American Diabetes A. 1. Strategies for Improving Care. *Diabetes Care* 2016;39 Suppl 1:S6-12. doi: 10.2337/dc16-S004
37. American Diabetes A. 2. Classification and Diagnosis of Diabetes. *Diabetes Care* 2016;39 Suppl 1:S13-22. doi: 10.2337/dc16-S005
38. American Diabetes A. 3. Foundations of Care and Comprehensive Medical Evaluation. *Diabetes Care* 2016;39 Suppl 1:S23-35. doi: 10.2337/dc16-S006
39. American Diabetes A. 4. Prevention or Delay of Type 2 Diabetes. *Diabetes Care* 2016;39 Suppl 1:S36-8. doi: 10.2337/dc16-S007
40. American Diabetes A. 5. Glycemic Targets. *Diabetes Care* 2016;39 Suppl 1:S39-46. doi: 10.2337/dc16-S008
41. American Diabetes A. 6. Obesity Management for the Treatment of Type 2 Diabetes. *Diabetes Care* 2016;39 Suppl 1:S47-51. doi: 10.2337/dc16-S009
42. American Diabetes A. 7. Approaches to Glycemic Treatment. *Diabetes Care* 2016;39 Suppl 1:S52-9. doi: 10.2337/dc16-S010
43. American Diabetes A. 8. Cardiovascular Disease and Risk Management. *Diabetes Care* 2016;39 Suppl 1:S60-71. doi: 10.2337/dc16-S011
44. American Diabetes A. 9. Microvascular Complications and Foot Care. *Diabetes Care* 2016;39 Suppl 1:S72-80. doi: 10.2337/dc16-S012
45. American Diabetes A. 10. Older Adults. *Diabetes Care* 2016;39 Suppl 1:S81-5. doi: 10.2337/dc16-S013
46. American Diabetes A. 11. Children and Adolescents. *Diabetes Care* 2016;39 Suppl 1:S86-93. doi: 10.2337/dc16-S014

47. American Diabetes A. 13. Diabetes Care in the Hospital. *Diabetes Care* 2016;39 Suppl 1:S99-104. doi: 10.2337/dc16-S016
48. American Diabetes A, Anderson JE, Greene MA, et al. Diabetes and employment. *Diabetes Care* 2012;35 Suppl 1:S94-8. doi: 10.2337/dc12-s094
49. American Diabetes A, Anderson JE, Greene MA, et al. Diabetes and employment. *Diabetes Care* 2013;36 Suppl 1:S93-7. doi: 10.2337/dc13-S093
50. American Diabetes A, Anderson JE, Greene MA, et al. Diabetes and employment. *Diabetes Care* 2014;37 Suppl 1:S112-7. doi: 10.2337/dc14-S112
51. American Diabetes A, Lorber DL, Chavez RS, et al. Diabetes management in correctional institutions. *Diabetes Care* 2013;36 Suppl 1:S86-92. doi: 10.2337/dc13-S086
52. Assimos D, Krambeck A, Miller NL, et al. Surgical management of Stones: American Urological Association/Endourological Society Guideline: American Urological Association (AUA), Endourological Society., 2016.
53. Chang SS, Boorjian SA, Chou R, et al. Diagnosis and treatment of non-muscle invasive bladder cancer: AUA/SUO guideline: American Urological Association (AUA), Society of Urologic Oncology (SUO). 2016.
54. Davis R, Jones S, Barocas DA, et al. Diagnosis, evaluation and follow-up of asymptomatic microhematuria (AMH) in adults: AUA guideline: American Urological Association (AUA), 2012.
55. Evert AB, Boucher JL, Cypress M, et al. Nutrition therapy recommendations for the management of adults with diabetes. *Diabetes Care* 2014;37 Suppl 1:S120-43. doi: 10.2337/dc14-S120
56. Gormley EA, Lightner DJ, Burgio KL, et al. Diagnosis and treatment of overactive bladder (Non-neurogenic) in adults: AUA/SUFU guideline: American Urological Association, Society of Urodynamics, Female Pelvic medicine & Urogenital Reconstruction., 2014.
57. Hanno PM, Burks DA, Clemens JQ, et al. Diagnosis and treatment of interstitial cystitis/bladder pain syndrome: American Urological Association (AUA), 2014.
58. Harter M, Klesse C, Bermejo I, et al. Unipolar depression: diagnostic and therapeutic recommendations from the current S3/National Clinical Practice Guideline. *Dtsch Arztebl Int* 2010;107(40):700-8. doi: 10.3238/arztebl.2010.0700
59. Hillegass E, Puthoff M, Frese EM, et al. Role of Physical Therapists in the Management of Individuals at Risk for or Diagnosed With Venous Thromboembolism: Evidence-Based Clinical Practice Guideline. *Phys Ther* 2016;96(2):143-66. doi: 10.2522/ptj.20150264
60. James PA, Oparil S, Carter BL, et al. 2014 evidence-based guideline for the management of high blood pressure in adults: report from the panel members appointed to the Eighth Joint National Committee (JNC 8). *JAMA* 2014;311(5):507-20. doi: 10.1001/jama.2013.284427
61. Jensen MD, Ryan DH, Apovian CM, et al. 2013 AHA/ACC/TOS guideline for the management of overweight and obesity in adults: a report of the American College of Cardiology/American Heart Association Task Force on Practice Guidelines and The Obesity Society. *Circulation* 2014;129(25 Suppl 2):S102-38. doi: 10.1161/01.cir.0000437739.71477.ee
62. Moran A, Brunzell C, Cohen RC, et al. Clinical care guidelines for cystic fibrosis-related diabetes: a position statement of the American Diabetes Association and a clinical practice guideline of the Cystic Fibrosis Foundation, endorsed by the Pediatric Endocrine Society. *Diabetes Care* 2010;33(12):2697-708. doi: 10.2337/dc10-1768
63. Nehra A, Alterowitz R, Culkin DJ, et al. Peyronie's disease: AUA guideline: American Urological Association (AUA), 2015.
64. Ommer A, Herold A, Berg E, et al. Cryptoglandular anal fistulas. *Dtsch Arztebl Int* 2011;108(42):707-13. doi: 10.3238/arztebl.2011.0707
65. Pearle MS, Goldfarb DS, Assimos DG, et al. Medical management of kidney stones: AUA guideline: American Urological Association (AUA), 2014.

66. Peter WF, Jansen MJ, Hurkmans EJ, et al. Physiotherapy in hip and knee osteoarthritis: development of a practice guideline concerning initial assessment, treatment and evaluation. *Acta Reumatol Port* 2011;36(3):268-81.
67. Richmond J, Hunter D, Irrgang J, et al. American Academy of Orthopaedic Surgeons clinical practice guideline on the treatment of osteoarthritis (OA) of the knee. *J Bone Joint Surg Am* 2010;92(4):990-3. doi: 10.2106/JBJS.I.00982
68. Stone NJ, Robinson JG, Lichtenstein AH, et al. 2013 ACC/AHA guideline on the treatment of blood cholesterol to reduce atherosclerotic cardiovascular risk in adults: a report of the American College of Cardiology/American Heart Association Task Force on Practice Guidelines. *Circulation* 2014;129(25 Suppl 2):S1-45. doi: 10.1161/01.cir.0000437738.63853.7a
69. Valente M, barninger KH. Adult patients with severe-to-profound unilateral sensorineural hearing loss: American Academy of Audiology, 2015.
